# Supplementary material for: Glioma imaging in Europe: A survey of 220 centres and recommendations for best clinical practice
Source: PubMed Central journal article supplement (PMC6028837; doi:10.1007/s00330-018-5314-5), 2018-03-13
Supplement: 330_2018_5314_MOESM2_ESM.pdf [file 330_2018_5314_MOESM2_ESM.pdf]

## Supplement 2 – Tables 1 to 10

| General information |                  |                 |                   |                     |                     |                  |
|---------------------|------------------|-----------------|-------------------|---------------------|---------------------|------------------|
| Institution         |                  |                 | Position held     |                     |                     |                  |
| Academic Hospital   | General hospital | Oncology Centre | Neuro-radiologist | General radiologist | Trainee radiologist | Other profession |
| 58.7 (129)          | 37.9 (83)        | 14.6 (32)       | 80 (176)          | 9.5 (21)            | 5.9 (13)            | 4.5 (10)         |
| Hospital services   |                  |                 | Physicist support |                     |                     |                  |
| Neurosurgery        | Radiotherapy     | Neuro-oncology  | None              | General physicist   | Neurophysicist      |                  |
| 84.5 (186)          | 81.4 (179)       | 76.4 (168)      | 39.5 (87)         | 35.5 (78)           | 23.6 (52)           |                  |

**Table 1** Demographic data and hospital services at participating institutions. Results are shown as % of answers (absolute number of answers).

| Structural MRI                          |             |             |                                 |                              |              |            |            |            |          |
|-----------------------------------------|-------------|-------------|---------------------------------|------------------------------|--------------|------------|------------|------------|----------|
| Glioma primary diagnosis (MRI per week) |             |             | Glioma follow up (MRI per week) |                              |              |            |            |            |          |
| < 1 study                               | 1-5 studies | > 5 studies | < 5 studies                     | 5-10 studies                 | > 10 studies |            |            |            |          |
| 16.4 (36)                               | 54.1 (119)  | 28.6 (63)   | 26.4 (58)                       | 34.5 (76)                    | 37.3 (82)    |            |            |            |          |
| Protocol duration (in minutes)          |             |             |                                 | Routine structural sequences |              |            |            |            |          |
| < 20                                    | 20-30       | 31-60       | > 60                            | T2w                          | FLAIR        | T1w        | T1w+C      | DWI        | T2*/SWI  |
| 5 (11)                                  | 45.9 (101)  | 46.4 (102)  | 2.7 (6)                         | 95.5 (210)                   | 98.6 (217)   | 99.1 (218) | 99.1 (218) | 99.1 (218) | 65 (143) |

**Table 2** Structural imaging practices in Europe. Results are shown as % of answers (absolute number of answers).

| Volumetric Imaging                         |              |           |            |           |                                      |           |           |            |          |
|--------------------------------------------|--------------|-----------|------------|-----------|--------------------------------------|-----------|-----------|------------|----------|
| Which 3D sequences do you use?             |              |           |            |           | 2D only users wishing 3D acquisition |           |           |            |          |
| T2w                                        | FLAIR        | T1w       | T1w+C      | T2*/SWI   | T2w                                  | FLAIR     | T1w       | T2*/SWI    | Other    |
| 3.9 (7)                                    | 31.1 (56)    | 9.4 (71)  | 98.3 (177) | 15.6 (28) | 30.8 (8)                             | 65.4 (17) | 69.2 (18) | 15.4 (4)   | 19.2 (5) |
| T1w sequence(s) used to depict enhancement |              |           |            |           | Comfortable with FSPGR/MPRAGE only?  |           |           |            |          |
| 2D-SE                                      | FSPGR/MPRAGE | 3D-SE     | Other      |           | Yes                                  | No        |           | Don't know |          |
| 52 (111)                                   | 72.2 (159)   | 12.8 (28) | 8.8 (20)   |           | 40.5 (89)                            | 44.5 (98) |           | 15 (30)    |          |

**Table 3** Volumetric imaging. Results are shown as % of answers (absolute number of answers).

| Diffusion-weighted MRI |                |                   |
|------------------------|----------------|-------------------|
| Assessment of ADC map  |                |                   |
| Visual only            | ROI comparison | Advanced analysis |
| 78.2 (172)             | 17.7 (39)      | 3.2 (7)           |

**Table 4** Respondents' practices for ADC assessment. Results are shown as % of answers (*absolute number of answers*).

| Perfusion MRI (pMRI)                          |                                                                   |                  |                      |                        |                                                 |                     |                 |           |            |
|-----------------------------------------------|-------------------------------------------------------------------|------------------|----------------------|------------------------|-------------------------------------------------|---------------------|-----------------|-----------|------------|
| When do you acquire pMRI?                     |                                                                   |                  |                      |                        |                                                 |                     |                 |           |            |
| Always in glioma                              | Primary diagnosis only                                            | Follow up only   | Upon indication only |                        |                                                 |                     |                 |           |            |
| 49.1 (108)                                    | 10.9 (24)                                                         | 3.6 (8)          | 21.4 (47)            |                        |                                                 |                     |                 |           |            |
| Reasons for using pMRI                        |                                                                   |                  |                      | pMRI protocol duration |                                                 |                     |                 |           |            |
| For clinical diagnosis                        | Biopsy guidance                                                   | To guide therapy | Mainly research      | ≤5 mins                | ≤2 mins                                         | Don't know          |                 |           |            |
| 79.7 (149)                                    | 46 (86)                                                           | 61.5 (115)       | 13.4 (25)            | 83.5 (71)              | 45 (38)                                         | 5 (4)               |                 |           |            |
| Reasons for always acquiring pMRI             |                                                                   |                  |                      |                        |                                                 |                     |                 |           |            |
|                                               | I want it to be available when I need it                          |                  |                      |                        |                                                 | 43.6 (61)           |                 |           |            |
|                                               | I (almost) always find it useful                                  |                  |                      |                        |                                                 | 55.7 (78)           |                 |           |            |
|                                               | It impacts patient care and management                            |                  |                      |                        |                                                 | 56.4 (79)           |                 |           |            |
|                                               | Clinicians always want it                                         |                  |                      |                        |                                                 | 7.9 (11)            |                 |           |            |
|                                               | I acquire it for logistical reasons (e.g. standardised protocols) |                  |                      |                        |                                                 | 30 (42)             |                 |           |            |
|                                               | For research purposes                                             |                  |                      |                        |                                                 | 24.3 (34)           |                 |           |            |
|                                               | To maintain radiographers' level of experience                    |                  |                      |                        |                                                 | 15.7 (22)           |                 |           |            |
| pMRI method                                   |                                                                   |                  |                      | Preload                |                                                 |                     |                 |           |            |
| DSC                                           | DCE                                                               | ASL              | ≥ 2 methods          | Yes                    | No                                              | Don't know          |                 |           |            |
| 81.8 (153)                                    | 29.4 (55)                                                         | 12.3 (23)        | 21.4 (40)            | 46.5 (87)              | 46 (86)                                         | 7.5 (14)            |                 |           |            |
| Preload bolus size (of typical contrast dose) |                                                                   |                  |                      |                        | Total contrast given (of typical contrast dose) |                     |                 |           |            |
| 1/3                                           | ½                                                                 | Full             | Don't know           | Other                  | Single                                          | 1+1/3               | 1+1/2           | Double    | Don't know |
| 42.5 (37)                                     | 16.1 (14)                                                         | 10.3 (9)         | 11.5 (10)            | 19.5 (17)              | 53.8 (99)                                       | 13 (24)             | 8.2 (15)        | 14.7 (27) | 7.6 (14)   |
| pMRI analysis                                 |                                                                   |                  |                      |                        | How do you assess glioma perfusion?             |                     |                 |           |            |
| Scanner software                              | NordicICE                                                         | Olea             | Other                |                        | Qualitatively only                              | ROI comparison NAWM | Other technique |           |            |
| 78.5 (146)                                    | 4.8 (9)                                                           | 4.8 (9)          | 7 (13)               |                        | 43.5 (81)                                       | 51.1 (95)           | 5.4 (10)        |           |            |

**Table 5** Perfusion MRI (pMRI). Results are shown as % of answers (*absolute number of answers*).

## MR spectroscopy (MRS)

| When do you acquire MRS? |                 |                        |                 |                       |                       |                      |
|--------------------------|-----------------|------------------------|-----------------|-----------------------|-----------------------|----------------------|
| Always in glioma         |                 | Primary diagnosis only |                 | Follow up only        |                       | Upon indication only |
| 21 (46)                  |                 | 22.4 (49)              |                 | 1.8 (4)               |                       | 35.2 (77)            |
| Reasons for using MRS    |                 |                        |                 | MRS protocol duration |                       |                      |
| For clinical diagnosis   | Biopsy guidance | To guide management    | Mainly research | ≤ 15 mins             | ≤10 mins              | Don't know           |
| 87.5 (154)               | 26.7 (47)       | 46.6 (82)              | 10.8 (19)       | 75.9% (60)            | 59.5 (47)             | 10.1 (8)             |
| MRS method               |                 |                        |                 | TE                    |                       |                      |
| SVS                      |                 | MVS/CSI                |                 | Short (30 ms)         | Intermediate (144 ms) | Long (270 ms)        |
| 75 (132)                 |                 | 60.8 (107)             |                 | 68.8 (119)            | 67.1 (117)            | 13.3 (23)            |

**Table 6** MRS in glioma imaging. Results are shown as % of answers (*absolute number of answers*). Comment: In free text answers, approximately one third of users expressed doubts about the clinical value and impact of MRS, whereas others reported a moderate to high impact. MRS reporting was most commonly undertaken together with structural MRI reporting.

## Functional MRI (fMRI)

| Do you use fMRI?       |            |                        | Why do you use fMRI? |                                                                       |                       |                           |                            |
|------------------------|------------|------------------------|----------------------|-----------------------------------------------------------------------|-----------------------|---------------------------|----------------------------|
| Yes                    | No         | Import into navigation | Pre-surgical         | Guide management                                                      | Research              |                           |                            |
| 49.8 (109)             | 50.2 (110) | 62.4 (68)              | 95.4 (104)           | 16.5 (18)                                                             | 15.6 (17)             |                           |                            |
| fMRI protocol duration |            |                        |                      | Which function(s) do you assess with fMRI (depending on lesion site?) |                       |                           |                            |
| < 15 mins              | 15-30 mins | >30 mins               | Don't know           | Language lateralisation                                               | Language localisation | Motor cortex localisation | Visual cortex localisation |
| 45.1 (23)              | 21.6 (11)  | 23.5 (12)              | 9.8 (5)              | 90.8 (99)                                                             | 79.8 (87)             | 97.2 (106)                | 42.4 (46)                  |

**Table 7** fMRI. Results are shown as % of answers (*absolute number of answers*)

## Diffusion tensor imaging (DTI)

| Do you use DTI?       |            |                                                                      | Why do you use DTI? |                  |           |                     |           |         |
|-----------------------|------------|----------------------------------------------------------------------|---------------------|------------------|-----------|---------------------|-----------|---------|
| Yes                   | No         | Import into navigation                                               | Pre-surgical        | Guide management | Research  |                     |           |         |
| 63.9 (140)            | 36.1 (79)  | 59.3 (83)                                                            | 87.9 (123)          | 22.1 (31)        | 20.0 (28) |                     |           |         |
| DTI protocol duration |            | Which function(s) do you assess with DTI (depending on lesion site?) |                     |                  |           |                     |           |         |
| ≤10 mins              | Don't know | Cortico-spinal tract                                                 | Arcuate Fasciculus  | Optic radiation  | IFOF      | Uncinate fasciculus | FA maps   | Other   |
| 92.5 (50)             | 11.1 (6)   | 94.2 (131)                                                           | 61.2 (85)           | 54.0 (75)        | 25.9 (36) | 28.8 (40)           | 48.9 (68) | 3.6 (5) |

**Table 8** DTI. Results are shown as % of answers (*absolute number of answers*).

| Specific clinical situations                       |            |           |          |           |                                                     |                             |                                               |              |
|----------------------------------------------------|------------|-----------|----------|-----------|-----------------------------------------------------|-----------------------------|-----------------------------------------------|--------------|
| Used for tumour progression vs. radiation necrosis |            |           |          |           | Glioma follow up assessment                         |                             |                                               |              |
| pMRI                                               | Structural | MRS       | DWI      | Other     | Qualitative                                         | RANO                        | Volumetric                                    | Segmentation |
| 55.7<br>(122)                                      | 20.1 (44)  | 5.9 (13)  | 4.6 (10) | 13.7 (30) | 60.6 (132)                                          | 27.1 (59)                   | 7.3 (16)                                      | 2.8 (6)      |
| Early postoperative imaging                        |            |           |          |           | Reporting                                           |                             |                                               |              |
| < 24 hrs                                           | < 48 hrs   | < 72 hrs  | CT only  |           | Reporting a percentage of completeness of resection | Use of a reporting template | Protocol development together with clinicians |              |
| 16.1 (35)                                          | 33.5 (73)  | 12.4 (72) | 7.3 (16) |           | 17.2 (28)                                           | 23.3 (51)                   | 24.2 (53)                                     |              |

**Table 9** Clinical situations. Results are shown as % of answers (*absolute number of answers*).

| Technical                              |            |            |           |           |
|----------------------------------------|------------|------------|-----------|-----------|
| MRI Post-processing                    |            |            |           |           |
|                                        | pMRI       | MRS        | fMRI      | DTI       |
| Radiologist/radiology fellow           | 71.5 (133) | 62.5 (110) | 61.5 (67) | 64 (89)   |
| Resident in training                   | 22.6 (42)  | 18.2 (32)  | 15.6 (17) | 10.1 (14) |
| Technologist/radiographer              | 21.5 (40)  | 31.3 (55)  | 19.3 (21) | 20.1 (28) |
| Physicist                              | 8.1 (15)   | 20.5 (36)  | 22.9 (25) | 22.3 (31) |
| Researcher/research fellow             | 5.4 (10)   | 6.3 (11)   | 15.6 (17) | 14.4 (20) |
| Other                                  | 7 (13)     | 5.7 (10)   | 6.4 (7)   | 8.6 (12)  |
| Reasons for non-use                    |            |            |           |           |
|                                        | pMRI       | MRS        | fMRI      | DTI       |
| I have no technical MRI facility       | 42 (14)    | 46.5 (20)  | 49.5 (54) | 40.5 (32) |
| I don't know how to implement it       | 15.2 (5)   | 11.6 (5)   | 23.9 (26) | 13.9 (11) |
| I have no post-processing facility     | 39.4 (13)  | 32.6 (14)  | 34.9 (38) | 35.4 (28) |
| I am not trained to interpret          | 27.3 (9)   | 34.9 (15)  | 40.4 (44) | 22.8 (18) |
| Clinicians do not request it           | 36.4 (12)  | 32.6 (14)  | 35.8 (39) | 32.9 (26) |
| I don't find it useful                 | 0 (0)      | 23.3 (10)  | 6.4 (7)   | 10.1 (8)  |
| It is not reimbursed                   | 15.2 (5)   | 14 (6)     | 11 (12)   | 12.7 (10) |
| There is not enough time to perform it | 21.2 (7)   | 16.3 (7)   | 33.9 (37) | 25.3 (20) |
| Other                                  | 3 (1)      | 2.3 (1)    | 11 (12)   | 7.6 (6)   |

**Table 10** Advanced imaging data post-processing and reasons stated for non-use of modalities. Results are shown as % of answers (*absolute number of answers*).

General comment: A number of questions included the option 'other'. Please note, if this was answered by few individuals (< 5%), percentages are not quoted in the results. A small numbers of free text answers could not be deciphered, so these were excluded from the analysis.
